# Supplementary material for: Carbon-Supported KCoMoS2 for Alcohol Synthesis from Synthesis Gas
Source: MDPI journal article supplement (doi:10.3390/catal11111321), 2021-10-30
Supplement: s1 [file s1]

Supporting Information for the manuscript

# Carbon-Supported KCoMoS<sub>2</sub> for Alcohol Synthesis from Synthesis Gas

Mohamed E. Osman <sup>1,2</sup>, Vladimir V. Maximov <sup>1</sup>, Viktor S. Dorokhov <sup>1</sup>, Viktor M. Mukhin <sup>3</sup>, Tatiana F. Sheshko <sup>2</sup>, Patricia J. Kooyman <sup>4,\*</sup> and Viktor M. Kogan <sup>1</sup>

<sup>1</sup> N.D. Zelinsky Institute of Organic Chemistry RAS, 119991 Moscow, Russia; wadalmsna3.com@gmail.com (M.E.O.); maximovzioc@gmail.com (V.V.M.); viktor.s.dorokhov@yandex.ru (V.S.D.); kogan@akado.ru (V.M.K.)

<sup>2</sup> Department of Physical and Colloidal Chemistry, Peoples' Friendship University of Russia, 117198 Moscow, Russia; sheshko-tf@rudn.ru

<sup>3</sup> ENPO "Neorganika", JSC, 144001 Electrostal, Russia; viktormukhin@yandex.ru

<sup>4</sup> Chemical Engineering, University of Cape Town, Private Bag X3, Rondebosch 7701, South Africa

\* Correspondence: patricia.kooyman@uct.ac.za

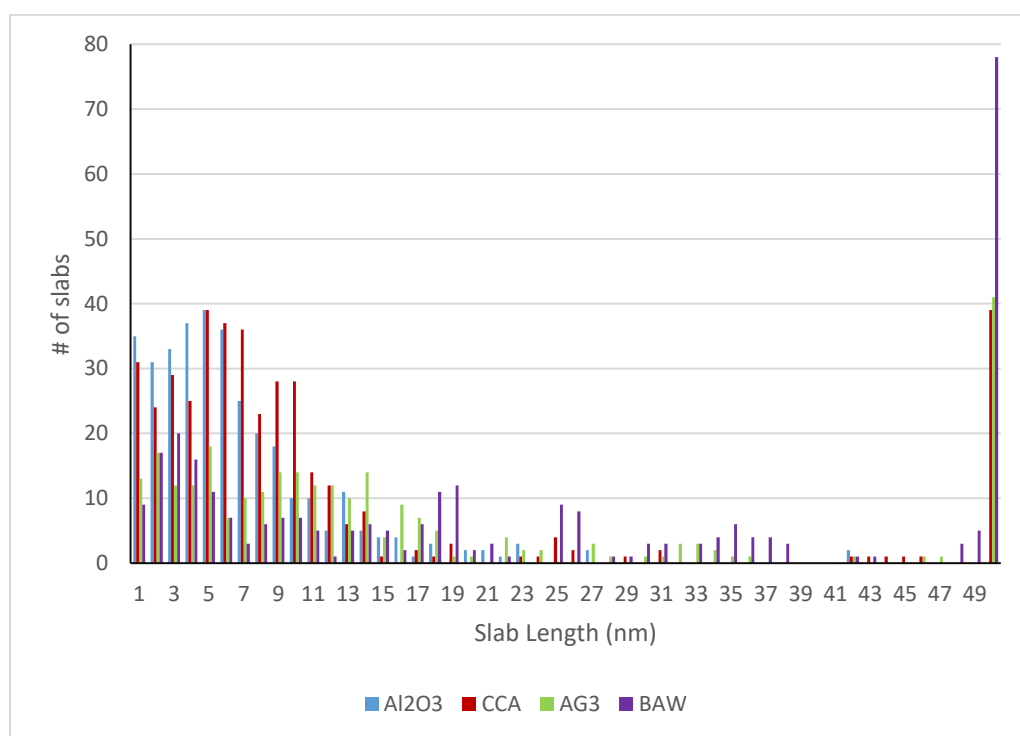

Figure S1. Slab length distribution obtained from minimum 300 individual slabs per sample as recorded from TEM images.

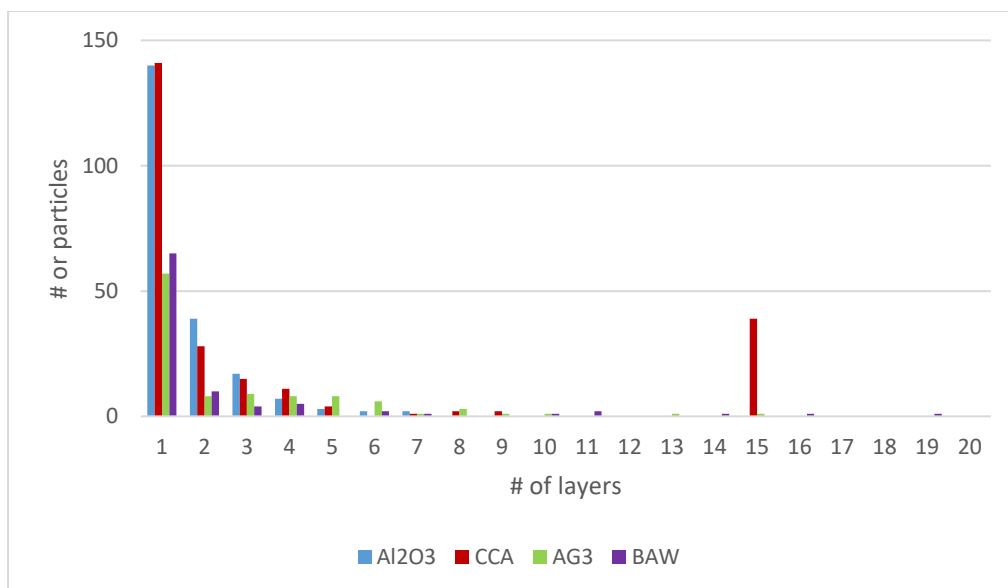

Figure S2. Slab degree of stacking distribution obtained from minimum 300 individual slabs per sample as recorded from TEM images.

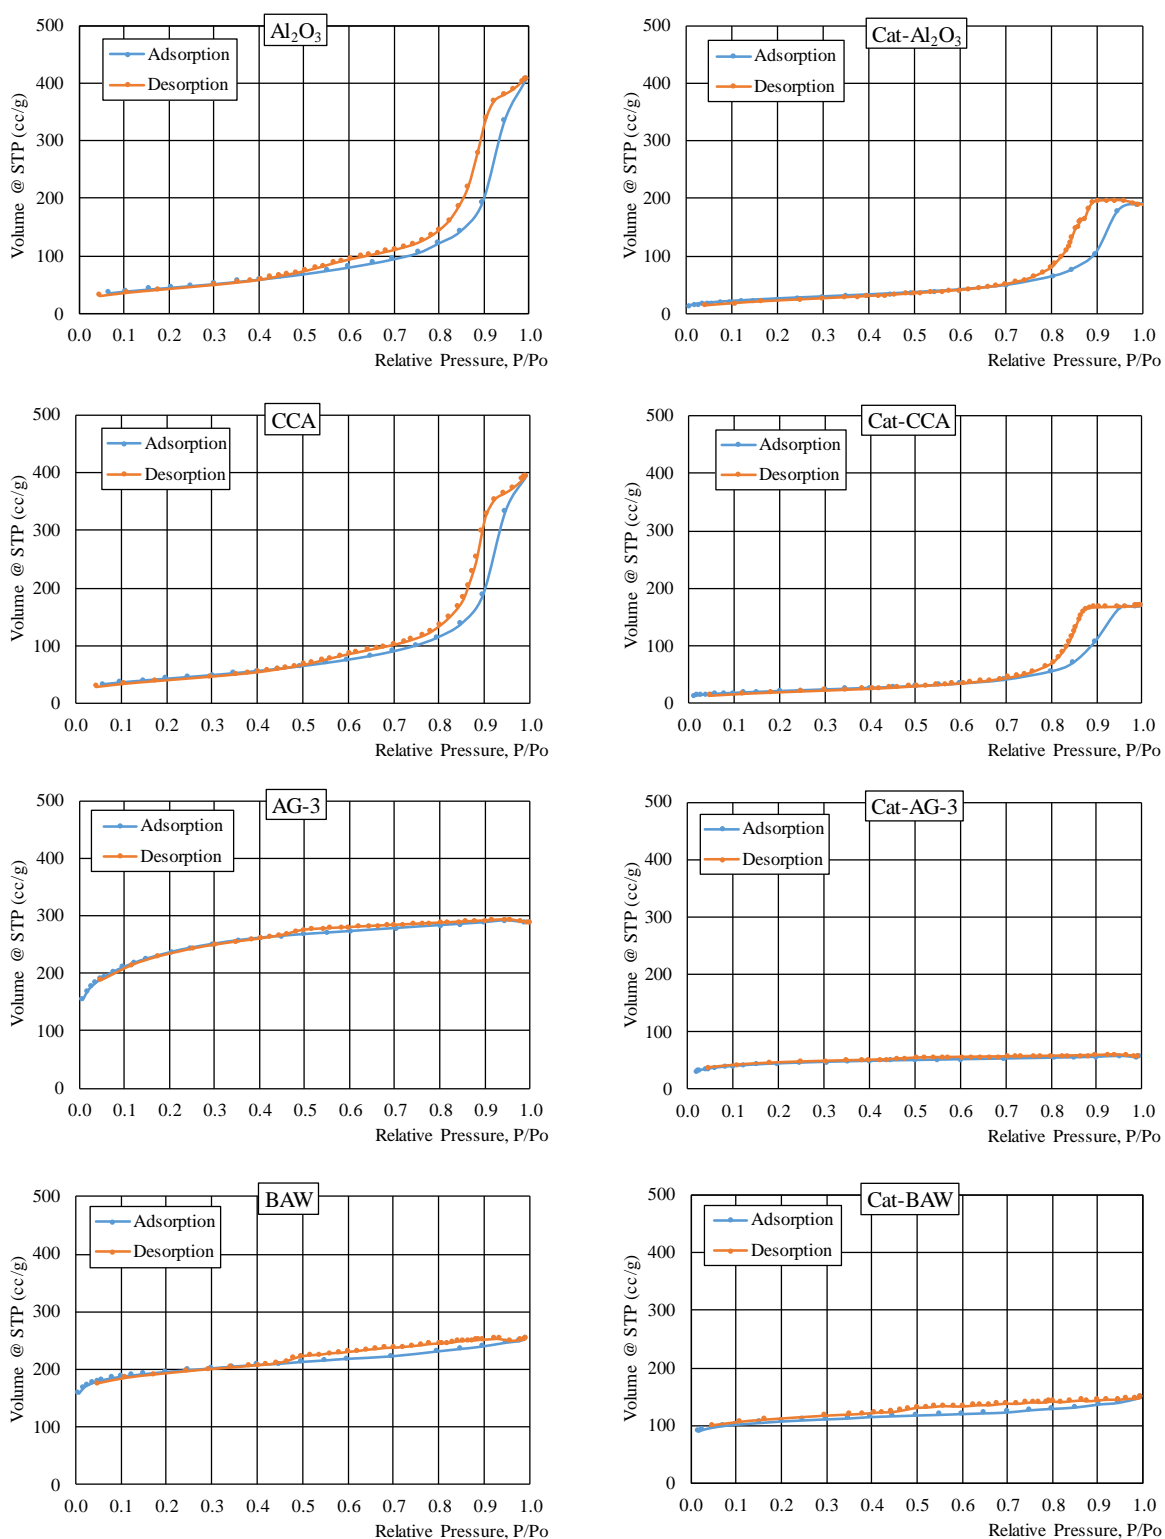

Figure S3.  $N_2$  adsorption/desorption isotherms for  $Al_2O_3$ , CCA, AG-3, and BAW support materials and corresponding  $KCoMoS_2$ -supported catalysts. Catalysts abbreviated as Cat-support.

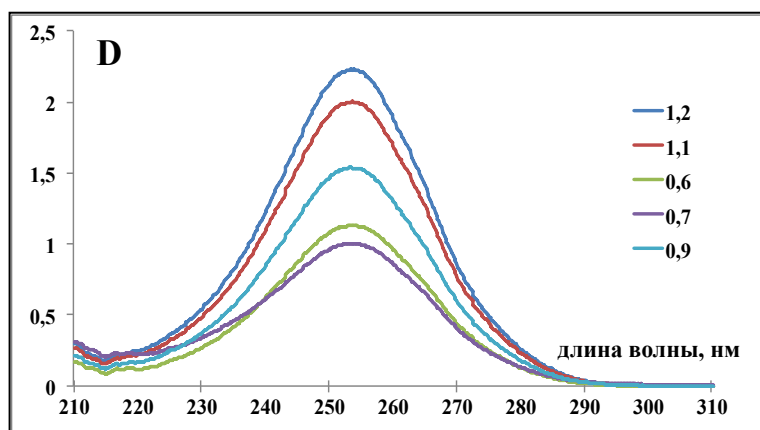

Figure S4. UV absorption spectra of pyridine in octane. Legend shows the concentration in mol/L.

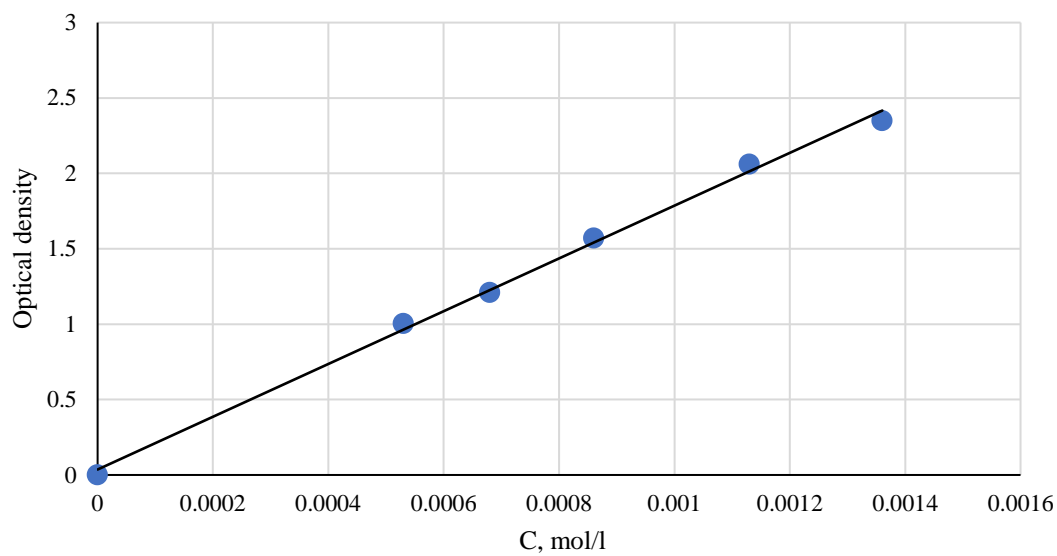

Figure S5. Calibration dependence of the UV signal (D) of the solution on the concentration of pyridine (mol/L) at 252 nm.  $y = 1749.8x + 0.0359$ ;  $R^2 = 0.997$ .

Table S1. Catalytic selectivities.

**Al<sub>2</sub>O<sub>3</sub>**

| T, oC | CO <sub>2</sub> | CH <sub>4</sub> | C <sub>2</sub> | C <sub>3</sub> | C <sub>4</sub> | MeOH  | EtOH  | PrOH1 | BuOH1 | iBuOH | AmOH1 | iAmOH | PrOH2 | BuOH2 |
|-------|-----------------|-----------------|----------------|----------------|----------------|-------|-------|-------|-------|-------|-------|-------|-------|-------|
| 300   | 9.2%            | 0.0%            | 0.0%           | 0.0%           | 0.0%           | 11.2% | 23.2% | 23.3% | 8.7%  | 14.6% | 3.8%  | 6.0%  | 0.0%  | 0.0%  |
| 320   | 12.4%           | 0.0%            | 0.0%           | 0.0%           | 0.0%           | 10.8% | 22.4% | 22.5% | 8.4%  | 14.1% | 3.7%  | 5.7%  | 0.0%  | 0.0%  |
| 340   | 15.9%           | 2.2%            | 0.4%           | 0.0%           | 0.0%           | 10.1% | 20.8% | 20.9% | 7.8%  | 13.1% | 3.5%  | 5.4%  | 0.0%  | 0.0%  |
| 360   | 24.7%           | 4.9%            | 1.0%           | 0.0%           | 0.0%           | 8.5%  | 17.6% | 17.7% | 6.6%  | 11.2% | 3.0%  | 4.6%  | 0.0%  | 0.0%  |

**CCA**

| T, oC | CO <sub>2</sub> | CH <sub>4</sub> | C <sub>2</sub> | C <sub>3</sub> | C <sub>4</sub> | MeOH | EtOH  | PrOH1 | BuOH1 | i-BuOH | AmOH1 | iAmOH | PrOH2 | BuOH2 |
|-------|-----------------|-----------------|----------------|----------------|----------------|------|-------|-------|-------|--------|-------|-------|-------|-------|
| 300   | 21.0%           | 6.5%            | 2.1%           | 0.0%           | 0.0%           | 5.2% | 21.3% | 21.4% | 8.3%  | 6.5%   | 3.4%  | 3.0%  | 0.6%  | 0.6%  |
| 320   | 26.0%           | 6.2%            | 1.8%           | 1.0%           | 0.0%           | 6.5% | 19.5% | 18.8% | 8.1%  | 6.2%   | 2.9%  | 2.5%  | 0.5%  | 0.0%  |
| 340   | 24.7%           | 8.2%            | 3.0%           | 6.3%           | 2.5%           | 4.1% | 16.8% | 15.9% | 7.4%  | 4.7%   | 2.7%  | 3.6%  | 0.0%  | 0.0%  |
| 360   | 31.0%           | 5.2%            | 3.9%           | 2.1%           | 1.8%           | 5.2% | 18.1% | 16.0% | 6.5%  | 5.9%   | 2.6%  | 1.8%  | 0.0%  | 0.0%  |

**AG-3**

| T, oC | CO <sub>2</sub> | CH <sub>4</sub> | C <sub>2</sub> | C <sub>3</sub> | C <sub>4</sub> | MeOH  | EtOH  | PrOH1 | BuOH1 | i-BuOH | AmOH1 | iAmOH | PrOH2 | BuOH2 |
|-------|-----------------|-----------------|----------------|----------------|----------------|-------|-------|-------|-------|--------|-------|-------|-------|-------|
| 300   | 24.7%           | 0.0%            | 0.0%           | 0.0%           | 0.0%           | 12.1% | 29.3% | 19.3% | 5.8%  | 5.1%   | 1.7%  | 2.1%  | 0.0%  | 0.0%  |
| 320   | 28.4%           | 2.8%            | 0.0%           | 0.0%           | 0.0%           | 11.0% | 26.7% | 17.6% | 5.3%  | 4.6%   | 1.5%  | 1.9%  | 0.0%  | 0.0%  |
| 340   | 23.7%           | 6.2%            | 0.0%           | 0.0%           | 0.0%           | 11.2% | 27.2% | 17.9% | 5.4%  | 4.7%   | 1.6%  | 2.0%  | 0.0%  | 0.0%  |
| 360   | 17.6%           | 4.7%            | 2.6%           | 0.0%           | 0.0%           | 12.0% | 29.2% | 19.2% | 5.8%  | 5.1%   | 1.7%  | 2.1%  | 0.0%  | 0.0%  |

**BAW**

| T, oC | CO <sub>2</sub> | CH <sub>4</sub> | C <sub>2</sub> | C <sub>3</sub> | C <sub>4</sub> | MeOH  | EtOH  | PrOH1 | BuOH1 | iBuOH | AmOH1 | iAmOH | PrOH2 | BuOH2 |
|-------|-----------------|-----------------|----------------|----------------|----------------|-------|-------|-------|-------|-------|-------|-------|-------|-------|
| 300   | 9.1%            | 1.0%            | 1.3%           | 0.0%           | 0.0%           | 14.1% | 35.0% | 23.2% | 8.1%  | 0.0%  | 8.1%  | 0.0%  | 0.0%  | 0.0%  |
| 320   | 8.3%            | 1.4%            | 1.7%           | 0.3%           | 1.9%           | 13.9% | 34.1% | 23.0% | 7.8%  | 0.0%  | 7.8%  | 0.0%  | 0.0%  | 0.0%  |
| 340   | 12.2%           | 2.3%            | 2.0%           | 1.8%           | 1.3%           | 12.7% | 31.7% | 21.3% | 7.4%  | 0.0%  | 7.4%  | 0.0%  | 0.0%  | 0.0%  |
| 360   | 14.4%           | 3.0%            | 3.5%           | 1.4%           | 1.9%           | 12.1% | 30.0% | 20.0% | 6.7%  | 0.0%  | 7.0%  | 0.0%  | 0.0%  | 0.0%  |

Table S2.  $\alpha$ -Factors at 360 °C.

| Cat                            | $\alpha_1$ | $\alpha_2$ | $\alpha_3$ | $\alpha_4$ |
|--------------------------------|------------|------------|------------|------------|
| Al <sub>2</sub> O <sub>3</sub> | 0.61       | 0.56       | 0.50       | 0.25       |
| CCA                            | 0.67       | 0.49       | 0.42       | 0.20       |
| AG-3                           | 0.61       | 0.38       | 0.35       | 0.22       |
| BAW                            | 0.64       | 0.39       | 0.33       | 0.39       |
